# Supplementary material for: Exposure to sublethal concentrations of methoxyfenozide disrupts honey bee colony activity and thermoregulation
Source: PLOS journal article supplement (doi:10.1371/journal.pone.0204635), 2019-03-28
Supplement: S1 (10.1371/journal.pone.0204635.s001) [file journal.pone.0204635.s001]

**S1 Table.** Effects of hive direction (direction which the hive faced) on piecewise regressions fit to pre-treatment continuous weight data: night slope, dawn break point, and dusk break point for the Fall 2017 field experiment. Analyses done with an AR(1) covariance matrix.

| Response variable | Effect                  | Num DF | Den DF | F Value | Pr > F |
|-------------------|-------------------------|--------|--------|---------|--------|
| Night slope       | North or South          | 1      | 40.98  | 0.10    | 0.7571 |
|                   | East or West            | 1      | 41.07  | 9.75    | 0.0033 |
|                   | Day                     | 8      | 124.7  | 29.15   | <.0001 |
|                   | February adult bee mass | 1      | 40.92  | 7.73    | 0.0082 |
| Dawn break point  | North or South          | 1      | 60.83  | 4.95    | 0.0298 |
|                   | East or West            | 1      | 61.06  | 0.16    | 0.6935 |
|                   | Day                     | 8      | 125.3  | 1.34    | 0.2291 |
| Dusk break point  | North or South          | 1      | 55.76  | 0.02    | 0.8828 |
|                   | East or West            | 1      | 56.02  | 7.48    | 0.0083 |
|                   | Day                     | 8      | 120.9  | 3.56    | 0.0010 |
